# Supplementary material for: Photo-controllable rotational motion of cholesteric liquid crystalline droplets in a dispersion system
Source: Royal Society of Chemistry journal article supplement (doi:10.1039/d0ra03465g), 2020-01-01
Supplement: d0ra03465g1.pdf [file d0ra03465g1.pdf]

1 Photo-controllable rotational motion of cholesteric liquid  
2 crystalline droplets in a dispersion system

3 Yota Sakai<sup>1</sup>, Woon Yong Sohn<sup>1</sup> and Kenji Katayama<sup>1,2,\*</sup>

4 <sup>1</sup> Department of Applied Chemistry, Chuo University, Tokyo 112-8551, Japan;

5 <sup>2</sup> PRESTO, Japan Science and Technology Agency (JST), Saitama 332-0012, Japan

6 \*Corresponding authors:

7 K. Katayama, Phone: +81-3-3817-1913, E-mail: [kkata@kc.chuo-u.ac.jp](mailto:kkata@kc.chuo-u.ac.jp)

8

9 Video information

10

11

12 Movie S1(a) A movie of the rotational motion of the S811-doped MBBA droplet in a PVA  
13 solution during the on-off irradiation of a UV light. The diameter of the droplet was 100  $\mu\text{m}$ . The file  
14 name is S1a\_S811\_doped\_MBBA.wmv. (b) A movie of the rotational motion of the R811-doped  
15 MBBA droplet in a PVA solution during the on-off irradiation of a UV light. The diameter of the  
16 droplet was 120  $\mu\text{m}$ . The file name is S1b\_R811\_doped\_MBBA.wmv. In both cases, the UV light  
17 was irradiated from the top side with an intensity of 25  $\text{mW}/\text{cm}^2$ , and the concentration of PVA was  
18 1 wt%.

19

20

21 Movie S2 A movie of rotational motion of the S811-doped MBBA droplet including a  
22 micron-sized polystyrene particle ( $D=1 \mu\text{m}$ ) in a PVA solution during the on-off irradiation of a UV  
23 light. The UV light was irradiated from the top side with an intensity of 25  $\text{mW}/\text{cm}^2$ . The concentration  
24 of PVA was 1 wt%. The diameter of the droplet was 80  $\mu\text{m}$ . The movie is played at 16 times faster  
25 speed than the original. The file name is S2\_polystyrene\_particle\_inside.wmv.

26

27 Movie S3 A movie of rotational motion of the R811-doped MBBA droplet in a PVA solution  
28 including a micron-sized polystyrene particle ( $D=1 \mu\text{m}$ ) during the on-off irradiation of a UV light.  
29 (During the observation, the particles constantly showed spontaneous random motion due to the  
30 Brownian motion.) The UV light was irradiated from the top side with an intensity of 25  $\text{mW}/\text{cm}^2$ .  
31 The concentration of PVA was 1 wt%. The movie is played at 8 times faster speed than the original.  
32 The file name is S3\_polystyrene\_particle\_outside.wmv.

33

34

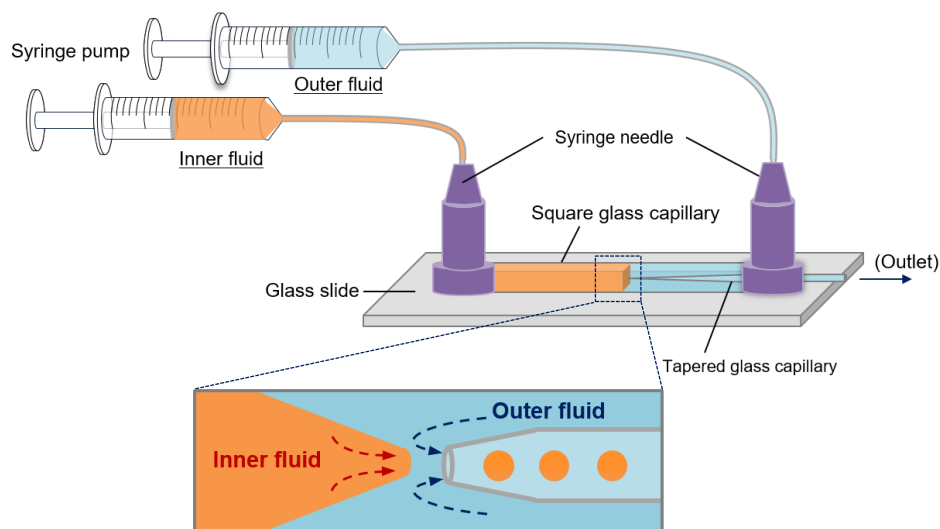

36 Fig.S1. The schematic of the microfluidic device consisted of a glass capillary, and the geometry of  
 37 micro-capillaries and the formation mechanism of a single emulsion is shown. A square glass capillary  
 38 (inner diameter:  $0.90 \times 0.90 \text{ mm}^2$ ) was attached on a glass slide, and a tapered cylindrical capillary was  
 39 inserted into it. The tapered capillary was prepared by tapering a tip of cylindrical glass capillary (inner  
 40 diameter:  $0.70 \times 0.70 \text{ mm}^2$ , outer diameter:  $0.87 \times 0.87 \text{ mm}^2$ ) using a micropipette puller (P-1000,  
 41 Sutter Instrument, Novato, CA, USA). The tip diameter was  $50 \text{ }\mu\text{m}$ . Syringe needles were connected  
 42 to the syringe pump via a micro-tube, and the two types of liquids (inner fluid and outer fluid) were  
 43 introduced. The inner fluid was sheared by the outer fluid in the inlet of the tapered cylindrical capillary,  
 44 and droplets were formed. The droplets were collected from the tapered capillary on the right side.  
 45 The hydrophilic treatment was applied for the tapered capillary by plasma cleaner (PDC-32G, Harrick  
 46 Plasma, Ithaca, NY, USA). The microfluidic device was operated at room temperature ( $25 \text{ }^\circ\text{C}$ ).

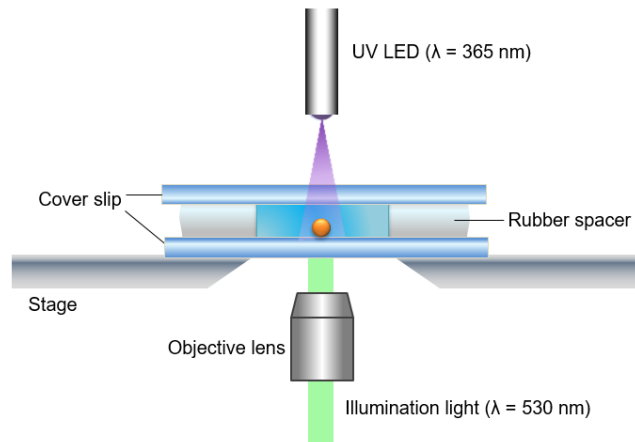

47

48 Fig.S2. A schematic drawing of the observation setup is shown. A rubber spacer (thickness: 0.2 mm)  
49 with an open space was sandwiched with two coverslips (thickness: 0.12~0.17 mm), and a PVA  
50 solution including CLC droplets was pipetted into the open space. The cell was placed on an inverted  
51 optical microscope (IX71, OLYMPUS), and the behavior of the LC droplets under light illumination  
52 (Execure LH-1V, HOYA, Center wavelength: 360 nm) was observed. The illumination light was a  
53 LED (DC2100, Thorlabs, wavelength: 530 nm).

54

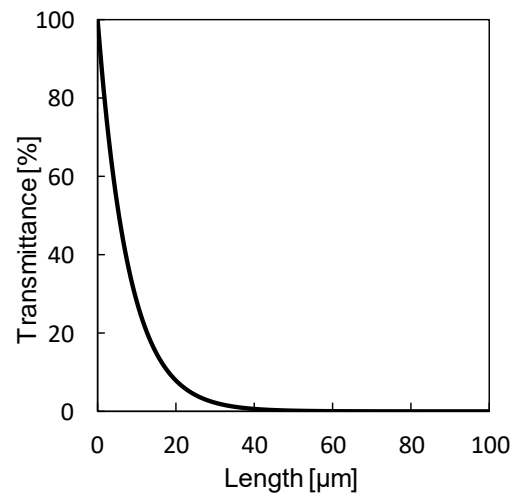

55 Fig.S3. The dependence of transmittance on the optical penetration depth for MBBA is shown. The  
56 absorption coefficient obtained from the absorbance at 365 nm was  $1.27 \times 10^4 \text{ cm}^{-1}$ , and the optical  
57 penetration depth was 40  $\mu\text{m}$ .

58

59
